# Supplementary material for: Differential Performance and Lung Deposition of Levofloxacin with Different Nebulisers Used in Cystic Fibrosis
Source: MDPI journal article supplement (doi:10.3390/ijms23179597), 2022-08-24

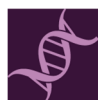

*Supplementary Materials*

# Differential Performance and Lung Deposition of Levofloxacin with Different Nebulisers Used in Cystic Fibrosis

Carsten Schwarz <sup>1</sup>, Claudio Procaccianti <sup>2</sup>, Laura Costa <sup>2</sup>, Riccardo Brini <sup>3</sup>, Richard Friend <sup>3</sup>, Grazia Caivano <sup>4</sup>, Hosein Sadafi <sup>5</sup>, Charles Mussche <sup>5</sup>, Nicolas Schwenck <sup>6</sup>, Michael Hahn <sup>6</sup>, Xabier Murgia <sup>7</sup> and Federico Bianco <sup>2,\*</sup>

## Supplementary Materials

**Supplementary Figure S1.** Structural differences between the airway trees reconstructed from patients 4 and 1 (patient 1 is representative for the other patients included in the study). Patient 4 had a narrow pharyngeal airway associated with a low intrathoracic levofloxacin deposition, irrespective of the nebuliser used.

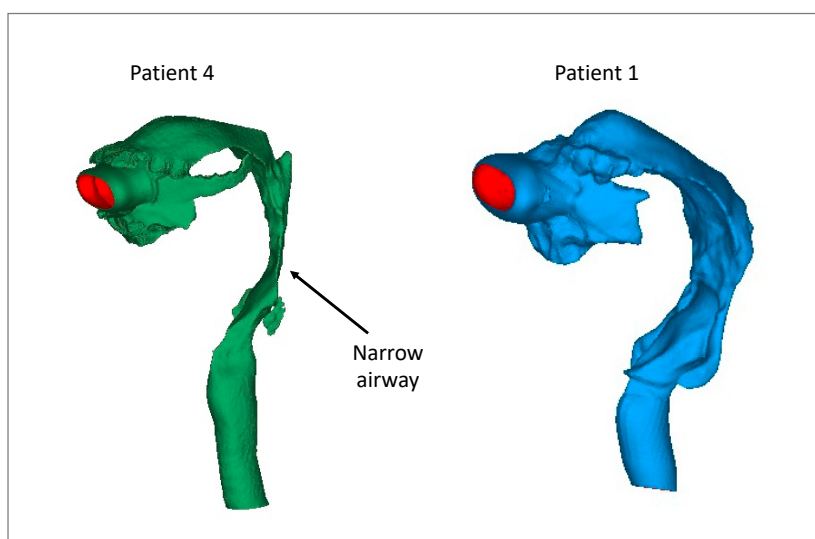

**Supplementary Figure S2.** Comparison of the intrathoracic levofloxacin deposition between the breathing pattern averaged from patients with mild CF (**Mild CF**: tidal volume [ $V_T$ ] of 759 mL, rate of 31 cycles/min, inspiratory:expiratory ratio [I:E] 1:1.23) and the “adult” compendial breathing pattern that was used in the delivered dose and delivery rate experiments (**USP**:  $V_T$  of 500 mL, rate of 15 cycles/min, I:E 1:1). The intrathoracic deposition was estimated through functional respiratory imaging experiments conducted with the reconstructed airways of  $n=3$  patients. Mean  $\pm$  standard deviation. \*\*  $p < 0.01$  ( $t$ -test).

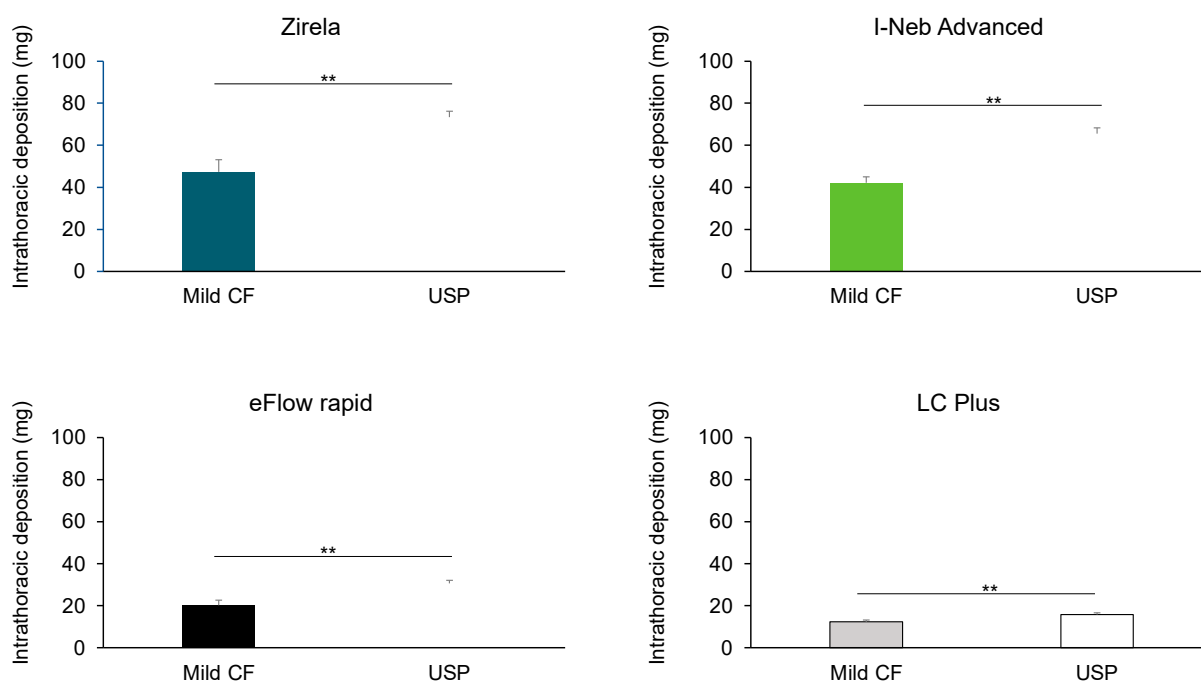

**Supplementary Figure S3.** Set-up to determine the delivered dose and delivery rate of levofloxacin according to the United States Pharmacopeia.

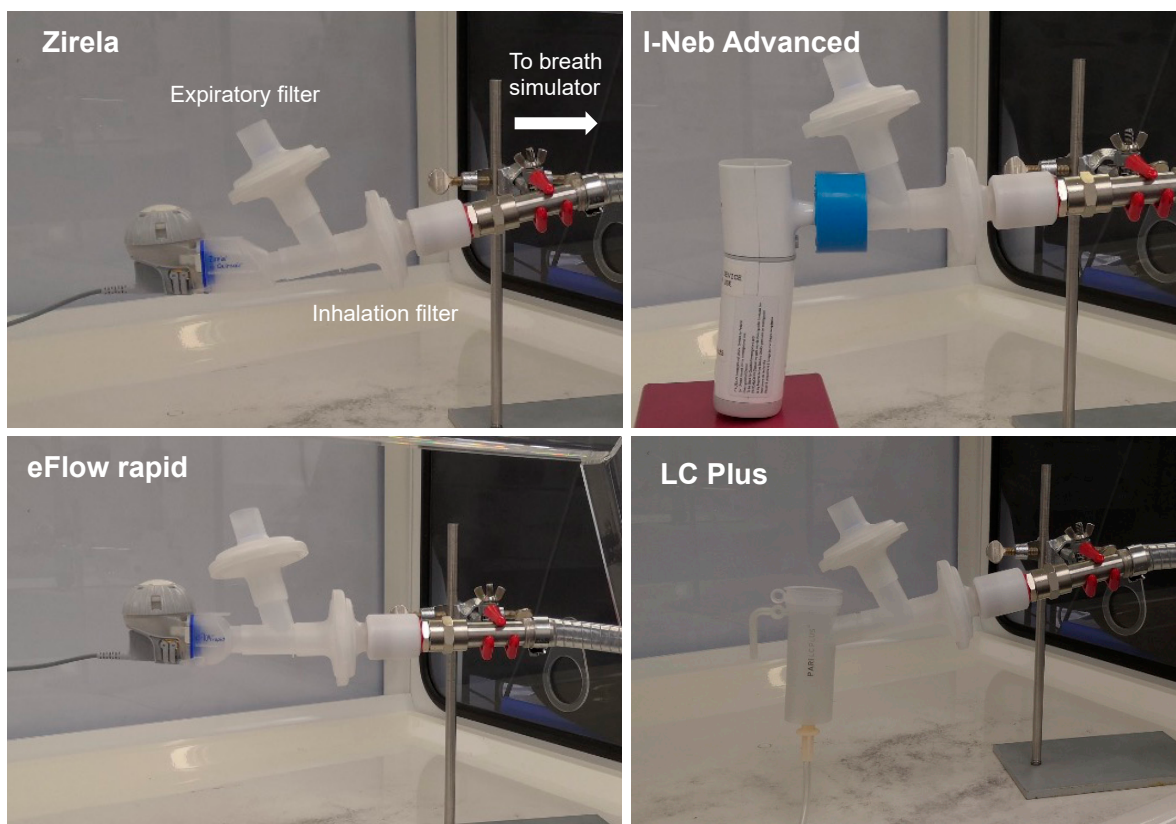

**Supplementary Method S1.** High-Pressure Liquid Chromatography (HPLC) method for levofloxacin detection.

Levofloxacin was extracted from the collection filters and rinsed from the next generation impactor stages using an extraction diluent consisting of Water/Methanol (80:20, v/v). The chromatographic method is reported below.

*Chromatographic conditions*

HPLC device: Agilent HPLC 1260 Infinity II.

Detector: Diode Array or Variable Wavelength

Wavelength: 260 nm

Run time: 6 min

Column: Synergy Polar-RP 4 $\mu$ m, 80A, 150  $\times$  3.0mm (Phenomenex)

Column temperature: 30°C

Autosampler temperature: 5°C

Injection volume: 5  $\mu$ l

Flow: 1 mL/min

Eluent A: 20mM potassium dihydrogen phosphate buffer pH 2.5

Eluent B: Methanol

Isocratic: Eluent A / Eluent B = 65/35 (v/v)

Rinse solution: Methanol/Water = 50/50 (v/v)

Retention time (RT): 4.1 min

**Supplementary Figure S4.** Set-up to determine the aerosol particle size distribution according to the United States Pharmacopeia.

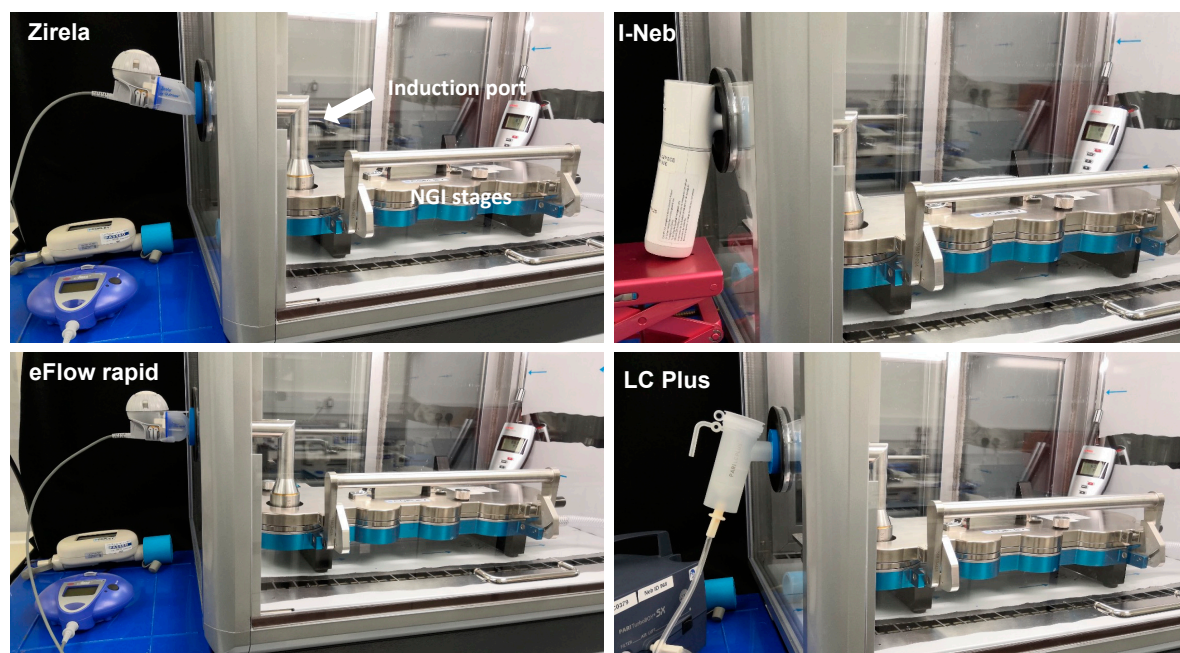

Supplement: s1 [file s1]
